# Supplementary material for: The Relationship between Structure and Performance of Different Polyimides Based on Molecular Simulations
Source: MDPI journal article supplement (doi:10.3390/polym15030646), 2023-01-27
Supplement: s1 [file s1]

# The Relationship between Structure and Performance of Different Polyimides Based on Molecular Simulations

## Supplementary Materials

Peng Zhang, Yadong Dai, Hansong Liu, Botao Dong, Yilun Yao, Jinsong Sun, Tao Yang, Xiangyu Zhong and Jianwen Bao

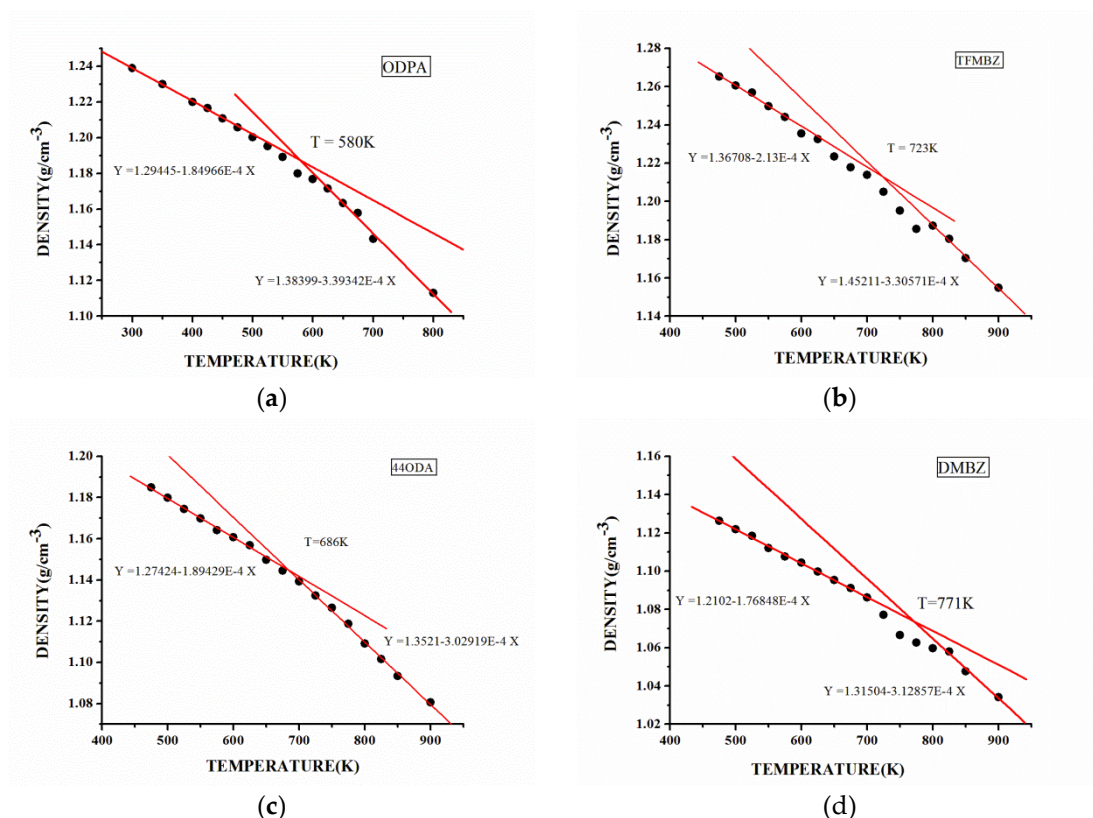

**Figure S1.** Linear fitting results of density variation with temperature of each simulated model. (a) ODPA-APB; (b)  $\alpha$ -BPDA-TFMBZ; (c)  $\alpha$ -BPDA-4,4-ODA; (d)  $\alpha$ -BPDA-DMBZ.

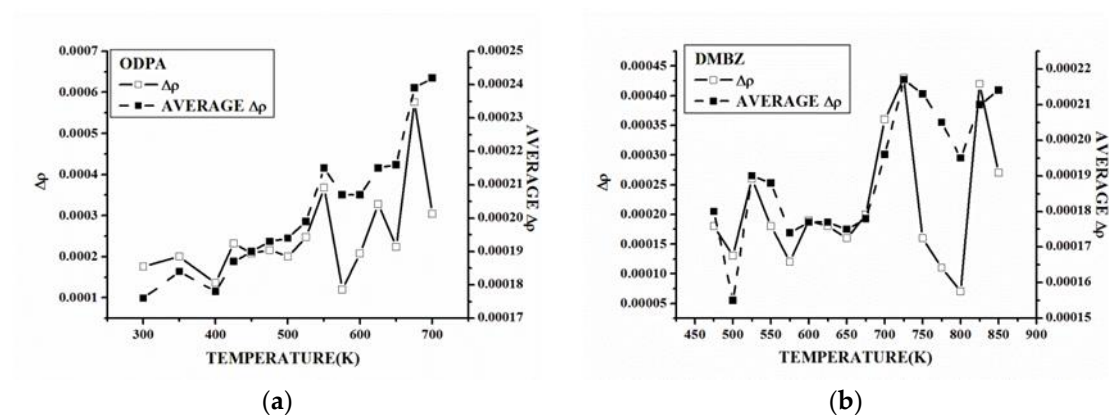

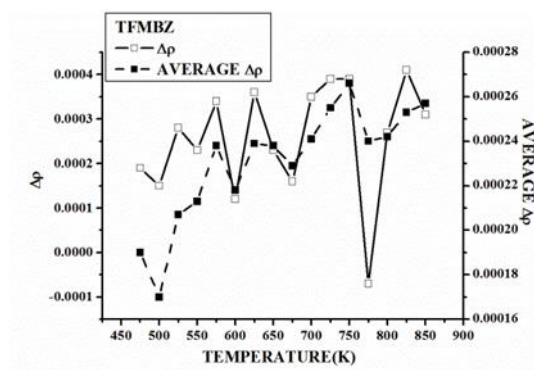

(c)

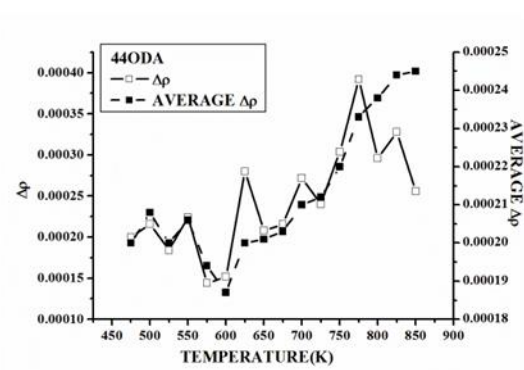

(d)

**Figure S2.**  $\Delta\rho$ - $T$  curves and  $\Delta\rho$  mean value curves with temperature of each system: (a) ODP-APB; (b)  $\alpha$ -BPDA-DMBZ; (c)  $\alpha$ -BPDA-TFMBZ; (d)  $\alpha$ -BPDA-4,4-ODA.

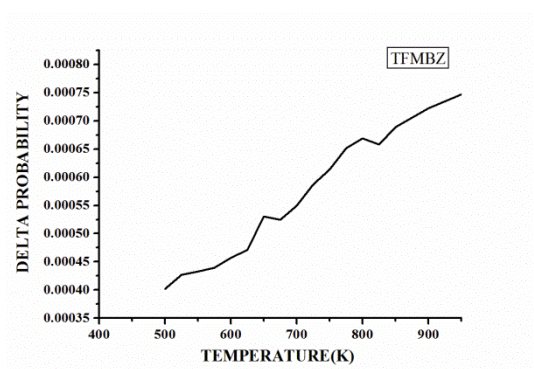

(a)

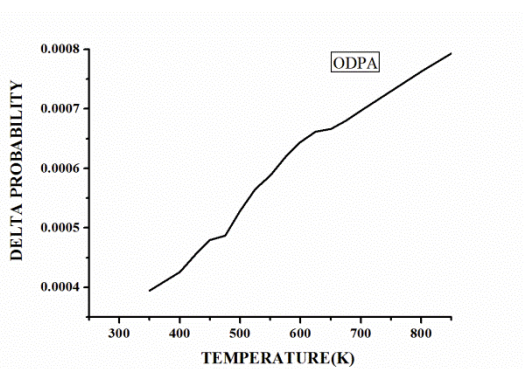

(b)

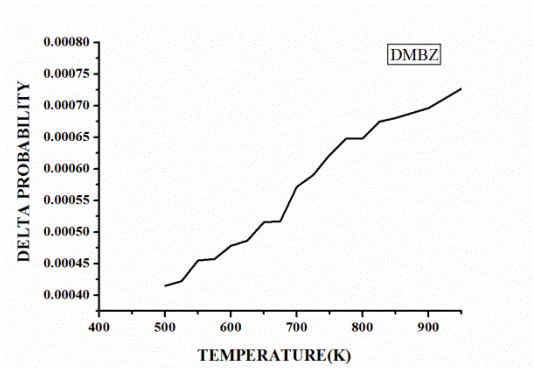

(c)

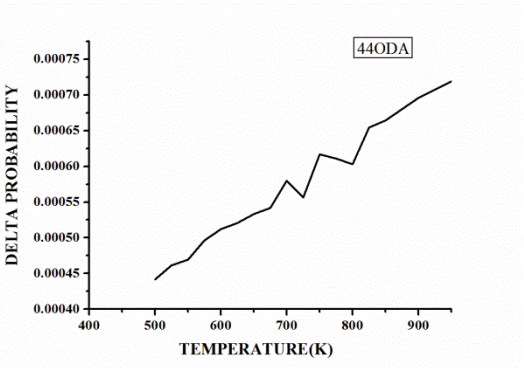

(d)

**Figure S3.** Temperature variation of dihedral angle distribution in main chain structure: (a)  $\alpha$ -BPDA-TFMBZ; (b) ODP-APB; (c)  $\alpha$ -BPDA-DMBZ; (d)  $\alpha$ -BPDA-4,4-ODA.
